# Supplementary material
Source: publisher site journal article supplement (https://www.dovepress.com/article/103105)
Supplement: Supplementary file 1 [file get_supplementary_file.php]

IRB

|    | name                                                             | address                                                 |
|----|------------------------------------------------------------------|---------------------------------------------------------|
| 1  | JR Sapporo Hospital Institutional Review Board                   | North 3, East 1, tyuo-ku, Sapporo                       |
| 2  | Shinsapporo Seiry Hospital Institutional Review Board            | 2-1-30, Ease 4, Atsubetsuhigashi, Atsubetsu-ku, Sapporo |
| 3  | Kitahirosima Hospital Institutional Review Board                 | 1-5-2, Sakaemachi, Kitahiroshima, Sapporo               |
| 4  | Saiseikai Central Institutional Review Board                     | 1-4-28, Mita, Minato-ku, Tokyo                          |
| 5  | Jobu Hospital for Respiratory Disease Institutional Review Board | 586-1, Taguchityo, Maebashi                             |
| 6  | Review Board for Human Rghts and Ethics for Clinical studies     | 13-2, Chiyoda-ku, Tokyo                                 |
| 7  | Kobari General Hospital Institutional Review Board               | 29-1, Yokonai, Noda                                     |
| 8  | Koto Hospital Institutional Review Board                         | 6-8-5, Ohshima, Kouto-ku, Tokyo                         |
| 9  | Hirokuni Clinic Institutional Review Board                       | 3-32-2, Nakakasai, Edogawa-ku, Tokyo                    |
| 10 | Nagata Hospital Institutional Review Board                       | 523-1, Shimomiyagamachi, Yanagawa                       |
| 11 | Tokyo-Eki Center Building Clinic Institutional Review Board      | 3-3-14, Nihonbashi, Cyuo-ku, Tokyo                      |
| 12 | Saiseikai Central Institutional Review Board                     | 1-4-28, Mita, Minato-ku, Tokyo                          |
| 13 | Yokohama Mirnoru Clinic Institutional Review Board               | 1-13-8, Bessyo, Minami-ku, Yokohama                     |
| 14 | Yokohama Mirnoru Clinic Institutional Review Board               | 1-13-8, Bessyo, Minami-ku, Yokohama                     |
| 15 | Nagaoka Red Cross Hospital Institutional Review Board            | 2-297-1, Chiaki, Nagaoka                                |
| 16 | Nagata Hospital Institutional Review Board                       | 523-1, Shimomiyagamachi, Yanagawa                       |
| 17 | Nishio Municipal Hospital Institutional Review Board             | 6, Kamiawahara, Kumamicho, Nishio                       |
| 18 | Saiseikai Central Institutional Review Board                     | 1-4-28, Mita, Minato-ku, Tokyo                          |
| 19 | Saiseikai Central Institutional Review Board                     | 1-4-28, Mita, Minato-ku, Tokyo                          |
| 20 | Nakatani Hospital Institutional Review Board                     | 2501, Hosoe, Harima-ku, Himeji                          |
| 21 | Hiroshima Teishin Hospital Institutional Review Board            | 19-16, Higashishiratoricho, Naka-ku, Hiroshima          |
| 22 | Gshozuka Clinic Institutional Review Board                       | 1-21-4, Gshozuka, Miyamae-ku, Kawasaki                  |
| 23 | Hamanomachi Hospital Institutional Review Board                  | 3-3-1, Nagahama, Chuo-ku, Fukuoka                       |
| 24 | Nagata Hospital Institutional Review Board                       | 523-1, Shimomiyagamachi, Yanagawa                       |
| 25 | Nagata Hospital Institutional Review Board                       | 523-1, Shimomiyagamachi, Yanagawa                       |
| 26 | Nagata Hospital Institutional Review Board                       | 523-1, Shimomiyagamachi, Yanagawa                       |
| 27 | Oita Red Cross Hospital Institutional Review Board               | 3-2-37, Sendaicho, Oita                                 |
| 28 | Kanto Central Hospital Institutional Review Board                | 6-25-1, Kamiyoga, Setagaya-ku, Tokyo                    |
| 29 | Sakayoi Clinic Institutional Review Board                        | 2-26-3, Higashiooi, Shinagawa-ku                        |
| 30 | Nippon Koukan Hospital Institutional Review Board                | 1-2-1, Koukandouri, Kawasaki-ku, Kawasaki               |
| 31 | Fujisawa Municipal Hospital Institutional Review Board           | 2-6-1, Fujisawa, Fujisawa                               |
| 32 | Fukui Prefectural Hospital Institutional Review Board            | 2-8-1, Yotui, Fukui                                     |
| 33 | Nakatani Hospital Institutional Review Board                     | 2501, Hosoe, Harima-ku, Himeji                          |
| 34 | Nagata Hospital Institutional Review Board                       | 523-1, Shimomiyagamachi, Yanagawa                       |
| 35 | Hakodate Goryokaku Hospital Institutional Review Board           | 38-3, Goryokakumachi, Hakodate                          |
| 36 | Hospital Hakodate Hokkaido Institutional Review Board            | 1-10-1, Minatocho, Hakodate                             |

|    |                                                                           |                                         |
|----|---------------------------------------------------------------------------|-----------------------------------------|
| 37 | Uno Internal and Respiratory Medicine Clinic Institutional Review Board   | 334-3, Uehara, Sannouchi, Isezaki       |
| 38 | Uno Internal and Respiratory Medicine Clinic Institutional Review Board   | 334-3, Uehara, Sannouchi, Isezaki       |
| 39 | Kanagawa Cardiovascular and Respiratory Center Institutional Review Board | 6-16-1, Tomiokahigashi, Kanazawa-ku     |
| 40 | Kobe City Medical Center West Hospital Institutional Review Board         | 1-2-4, Ichibancho, Nagata-ku, Kobe      |
| 41 | Yokohama Mirnoru Clinic Institutional Review Board                        | 1-13-8, Bessyo, Minami-ku, Yokohama     |
| 42 | Yokohama Mirnoru Clinic Institutional Review Board                        | 1-13-8, Bessyo, Minami-ku, Yokohama     |
| 43 | Gshozuka Clinic Institutional Review Board                                | 1-21-4, Gosyozuka, Miyamae-ku, Kawasaki |
| 44 | Yasuda Clinic Institutional Review Board                                  | 53, Kuzeoyabucho, Minami-ku, Kyoto      |
| 45 | Sakayoi Clinic Institutional Review Board                                 | 2-26-3, Higashiooi, Shinagawa-ku, Tokyo |
| 46 | Boocs Clinic Fukuoka Institutional Review Board                           | 6-18, Tenyacho, Hakata-ku, Fukuoka      |
| 47 | Kagoshima Seikyo Hospital Institutional Review Board                      | 5-20-10, Taniyamachuo, Kagoshima        |
